# Supplementary material
Source: ML conference proceedings conference paper supplement (https://openreview.net/forum?id=j2EaW49Rk7)
Supplement: supplementary_material [file 04 April 2017 Cyclist Numbers for Web.xlsx]

## Sheet: April 2017 24 Hr Cyclist Counts
	Cyclist Counts on East River Bridge Locations
	April 2017 24-Hour Counts
	Bicycle and Greenway Program
	Date	Day	High Temp (°F)	Low Temp (°F)	Precipitation	Brooklyn Bridge	Manhattan Bridge	Williamsburg Bridge	Queensboro Bridge	Total
	2017-04-01	2017-04-01	46	37	0	606	1446	1915	1430	5397
	2017-04-02	2017-04-02	62.1	41	0	2021	3943	4207	2862	13033
	2017-04-03	2017-04-03	63	50	0.03	2470	4988	5178	3689	16325
	2017-04-04	2017-04-04	51.1	46	1.18	723	1913	2279	1666	6581
	2017-04-05	2017-04-05	63	46	0	2807	5276	5711	4197	17991
	2017-04-06	2017-04-06	48.9	41	0.73	461	1324	1739	1372	4896
	2017-04-07	2017-04-07	48	43	T	1222	2955	3399	2765	10341
	2017-04-08	2017-04-08	55.9	39.9	0	1674	3163	4082	2691	11610
	2017-04-09	2017-04-09	66	45	0	2375	4377	4886	3261	14899
	2017-04-10	2017-04-10	73.9	55	0	3324	6359	6881	4731	21295
	2017-04-11	2017-04-11	80.1	62.1	0	3887	7247	8079	5501	24714
	2017-04-12	2017-04-12	73.9	57.9	0.02	2565	5633	6620	4537	19355
	2017-04-13	2017-04-13	64	48.9	0	3353	6052	6775	4700	20880
	2017-04-14	2017-04-14	64.9	48.9	0	2942	5054	5877	4142	18015
	2017-04-15	2017-04-15	64.9	52	0	2253	3853	4965	3291	14362
	2017-04-16	2017-04-16	84.9	62.1	T	2877	4585	5259	3687	16408
	2017-04-17	2017-04-17	73.9	64	T	3152	6352	6924	4658	21086
	2017-04-18	2017-04-18	66	50	0	3415	6691	7341	5012	22459
	2017-04-19	2017-04-19	52	45	T	1965	4632	5234	3996	15827
	2017-04-20	2017-04-20	64.9	50	0.17	1567	3365	4302	3056	12290
	2017-04-21	2017-04-21	53.1	48	0.29	1426	3142	3674	2672	10914
	2017-04-22	2017-04-22	55.9	52	0.11	1318	2297	2963	2366	8944
	2017-04-23	2017-04-23	64.9	46.9	0	2520	4681	5105	3434	15740
	2017-04-24	2017-04-24	60.1	50	T	2544	5366	5762	4183	17855
	2017-04-25	2017-04-25	54	50	0.91	611	1402	1902	1578	5493
	2017-04-26	2017-04-26	59	54	0.34	1247	2774	3429	2369	9819
	2017-04-27	2017-04-27	68	59	0	2959	5311	6026	4285	18581
	2017-04-28	2017-04-28	82.9	57.9	0	3679	6774	7196	5138	22787
	2017-04-29	2017-04-29	84	64	0.06	3315	5605	6045	4078	19043
	2017-04-30	2017-04-30	64	54	0	2225	4057	4513	3137	13932
	T = trace of precipitation			S = snow
			2016	2017			Average Total Counts for April	2016	2017	Percent Change
		Average High Temp (°F)	60.58	63.7767			All Non-Holiday Weekday	15646	15875.2	0.0144406
		Average Low Temp (°F)	46.4133	50.6867			Full Month	14534.5	15029.1	0.0329073
		Total Precipitation (in)	1.47	3.73			Weekend	11941.1	13336.8	0.104649
		Days with Precip	13	14			Selected Days Average	18601.5	20840.2	0.120353
		Weekdays with Precip	9	12						Selected Days Average for the month includes all non-holiday weekdays with no precipitation (highlighted).
