# Supplementary material
Source: ML conference proceedings conference paper supplement (https://openreview.net/forum?id=j2EaW49Rk7)
Supplement: supplementary_material [file 06 June 2017 Cyclist Numbers for Web.xlsx]

## Sheet: June 2017 24 Hr Cyclist Counts
	Cyclist Counts on East River Bridge Locations
	June 2017 24-Hour Counts
	Bicycle and Greenway Program
	Date	Day	High Temp (°F)	Low Temp (°F)	Precipitation	Brooklyn Bridge	Manhattan Bridge	Williamsburg Bridge	Queensboro Bridge	Total
	2017-06-01	2017-06-01	78.1	62.1	0	3468	7328	8461	6184	25441
	2017-06-02	2017-06-02	73.9	60.1	0.01	3271	7007	7968	5293	23539
	2017-06-03	2017-06-03	72	55	0.01	2589	4510	6210	4084	17393
	2017-06-04	2017-06-04	68	60.1	0.09	1805	3127	4023	3023	11978
	2017-06-05	2017-06-05	66.9	60.1	0.02	2171	4552	5276	3359	15358
	2017-06-06	2017-06-06	55.9	53.1	0.06	1193	3021	3807	2572	10593
	2017-06-07	2017-06-07	66.9	54	0	3211	7180	7632	5072	23095
	2017-06-08	2017-06-08	68	59	0	3253	7083	7778	5288	23402
	2017-06-09	2017-06-09	80.1	59	0	3401	6859	7744	5155	23159
	2017-06-10	2017-06-10	84	68	0	3066	5193	6391	4425	19075
	2017-06-11	2017-06-11	90	73	0	2465	4388	5153	3178	15184
	2017-06-12	2017-06-12	91.9	77	0	2854	6265	7049	5032	21200
	2017-06-13	2017-06-13	93.9	78.1	T	2882	6141	7155	5399	21577
	2017-06-14	2017-06-14	84	69.1	0.29	2596	5630	6619	5152	19997
	2017-06-15	2017-06-15	75	66	0	3510	7854	8652	6344	26360
	2017-06-16	2017-06-16	68	66	0	2054	4857	5783	4474	17168
	2017-06-17	2017-06-17	73	66.9	1.39	1399	2633	3439	2977	10448
	2017-06-18	2017-06-18	84	72	T	2199	4014	4901	3396	14510
	2017-06-19	2017-06-19	87.1	70	1.35	1648	3553	4334	3552	13087
	2017-06-20	2017-06-20	82	72	0.03	3407	7473	7975	6091	24946
	2017-06-21	2017-06-21	82	72	0	3304	7416	8754	6159	25633
	2017-06-22	2017-06-22	82	70	0	3368	7624	8307	6289	25588
	2017-06-23	2017-06-23	82.9	75.9	0.04	2283	4683	5611	4330	16907
	2017-06-24	2017-06-24	82.9	71.1	1.29	2307	3933	5214	3396	14850
	2017-06-25	2017-06-25	82	69.1	0	2625	4882	5727	4197	17431
	2017-06-26	2017-06-26	78.1	66	0	3386	7217	7974	5845	24422
	2017-06-27	2017-06-27	75.9	61	0.18	3182	7317	6501	5580	22580
	2017-06-28	2017-06-28	78.1	62.1	0	3766	8239	8873	5834	26712
	2017-06-29	2017-06-29	81	68	0	3356	7544	8276	5662	24838
	2017-06-30	2017-06-30	88	73.9	T	2687	5890	7013	4754	20344
	T = trace of precipitation			S = snow
			2016	2017			Average Total Counts for June	2016	2017	Percent Change
		Average High Temp (°F)	79.9167	78.52			All Non-Holiday Weekday	23567.4	21633.9	-0.0893752
		Average Low Temp (°F)	65.4633	66.3233			Full Month	21718.4	19893.8	-0.0917144
		Total Precipitation (in)	2.6	4.76			Weekend	16633.5	15108.6	-0.100925
		Days with Precip	10	15			Selected Days Average	25025.7	23918.2	-0.0442551
		Weekdays with Precip	8	10						Selected Days Average for the month includes all non-holiday weekdays with no precipitation (highlighted).
