# Supplementary material
Source: ML conference proceedings conference paper supplement (https://openreview.net/forum?id=j2EaW49Rk7)
Supplement: supplementary_material [file 07 July 2017 Cyclist Numbers for Web.xlsx]

## Sheet: July 2017 24 Hr Cyclist Counts
	Cyclist Counts on East River Bridge Locations
	July 2017 24-Hour Counts
	Bicycle and Greenway Program
	Date	Day	High Temp (°F)	Low Temp (°F)	Precipitation	Brooklyn Bridge	Manhattan Bridge	Williamsburg Bridge	Queensboro Bridge	Total
	2017-07-01	2017-07-01	84.9	72	0.23	1848	2958	3845	3216	11867
	2017-07-02	2017-07-02	87.1	73	0	2467	3776	4173	3579	13995
	2017-07-03	2017-07-03	87.1	71.1	0.45	2714	4199	4924	4230	16067
	2017-07-04	2017-07-04	82.9	70	0	2296	4084	3684	3861	13925
	2017-07-05	2017-07-05	84.9	71.1	0	3170	6770	7308	5862	23110
	2017-07-06	2017-07-06	75	71.1	T	3065	6243	7302	5251	21861
	2017-07-07	2017-07-07	79	68	1.78	1513	3567	4421	3304	12805
	2017-07-08	2017-07-08	82.9	70	0	2718	4807	5781	3952	17258
	2017-07-09	2017-07-09	81	69.1	0	3048	5446	5782	4044	18320
	2017-07-10	2017-07-10	82.9	71.1	0	3506	7503	8106	5712	24827
	2017-07-11	2017-07-11	84	75	0	2929	6436	7249	5129	21743
	2017-07-12	2017-07-12	87.1	77	0	2860	6283	7102	4929	21174
	2017-07-13	2017-07-13	89.1	77	0	2563	5150	6116	4461	18290
	2017-07-14	2017-07-14	69.1	64.9	0.35	907	2182	2974	2147	8210
	2017-07-15	2017-07-15	82.9	68	0	2853	4857	5631	3918	17259
	2017-07-16	2017-07-16	84.9	70	0	2917	5190	5370	4062	17539
	2017-07-17	2017-07-17	84.9	73.9	0	3264	7316	7789	5468	23837
	2017-07-18	2017-07-18	87.1	75.9	0	3507	7732	8268	5531	25038
	2017-07-19	2017-07-19	91	77	0	3114	6710	7776	5247	22847
	2017-07-20	2017-07-20	93	78.1	0.01	2840	5980	6781	4804	20405
	2017-07-21	2017-07-21	91	77	0	2751	5469	6548	5005	19773
	2017-07-22	2017-07-22	91	78.1	0.57	2301	3745	4535	3841	14422
	2017-07-23	2017-07-23	78.1	73	0.06	2321	3756	4096	3124	13297
	2017-07-24	2017-07-24	69.1	63	0.74	1576	3584	3867	2835	11862
	2017-07-25	2017-07-25	71.1	64	0	3191	7201	7496	5698	23586
	2017-07-26	2017-07-26	75.9	66	0	3821	7987	8605	6556	26969
	2017-07-27	2017-07-27	77	66.9	T	3287	6624	7221	5997	23129
	2017-07-28	2017-07-28	84.9	73	0	3123	6135	6987	5496	21741
	2017-07-29	2017-07-29	75.9	68	0	2074	3787	5242	3711	14814
	2017-07-30	2017-07-30	81	64.9	0	3331	5282	5759	4324	18696
	2017-07-31	2017-07-31	88	66.9	0	3560	7404	7546	5774	24284
	T = trace of precipitation			S = snow
			2016	2017			Average Total Counts for July	2016	2017	Percent Change
		Average High Temp (°F)	85.529	82.7032			All Non-Holiday Weekday	22434.9	20261.1	-0.0968927
		Average Low Temp (°F)	72.7935	71.1			Full Month	19659.3	18804.8	-0.0434621
		Total Precipitation (in)	7.02	4.19			Weekend	14873.6	15746.7	0.0586998
		Days with Precip	15	10			Selected Days Average	25091.4	22863	-0.0888126
		Weekdays with Precip	10	10						Selected Days Average for the month includes all non-holiday weekdays with no precipitation (highlighted).
