# Supplementary material
Source: ML conference proceedings conference paper supplement (https://openreview.net/forum?id=j2EaW49Rk7)
Supplement: supplementary_material [file 08 August 2017 Cyclist Numbers for Web.xlsx]

## Sheet: Aug 2017 24 Hr Cyclist Counts
	Cyclist Counts on East River Bridge Locations
	AUGUST 2017 24-Hour Counts
	Bicycle and Greenway Program
	Date	Day	High Temp (°F)	Low Temp (°F)	Precipitation	Brooklyn Bridge	Manhattan Bridge	Williamsburg Bridge	Queensboro Bridge	Total
	2017-08-01	2017-08-01	91	72	0	3492	7290	7686	6050	24518
	2017-08-02	2017-08-02	86	69.1	0.09	2637	5966	6407	5288	20298
	2017-08-03	2017-08-03	86	70	0	3346	6728	7297	5835	23206
	2017-08-04	2017-08-04	82.9	70	0.15	2400	4447	5158	4427	16432
	2017-08-05	2017-08-05	77	70	0.3	3409	4520	5169	3907	17005
	2017-08-06	2017-08-06	75.9	64	0	3130	5088	5634	4207	18059
	2017-08-07	2017-08-07	71.1	64.9	0.76	804	1809	2669	2441	7723
	2017-08-08	2017-08-08	77	66	0	3598	7176	7571	5932	24277
	2017-08-09	2017-08-09	82.9	66	0	3893	7791	8589	6582	26855
	2017-08-10	2017-08-10	82.9	69.1	0	3423	7378	7850	6290	24941
	2017-08-11	2017-08-11	81	70	T	3148	6295	7068	5669	22180
	2017-08-12	2017-08-12	75.9	64.9	0.11	4146	4593	5443	4548	18730
	2017-08-13	2017-08-13	82	71.1	0	3274	5086	5419	4430	18209
	2017-08-14	2017-08-14	80.1	70	0	3291	6717	7301	5850	23159
	2017-08-15	2017-08-15	73	69.1	0.45	2149	4987	5976	4711	17823
	2017-08-16	2017-08-16	84.9	70	0	3685	7191	7852	6231	24959
	2017-08-17	2017-08-17	82	71.1	0	3637	6972	7871	6129	24609
	2017-08-18	2017-08-18	81	73	0.88	1064	2309	3113	2819	9305
	2017-08-19	2017-08-19	84.9	73	0	4693	4871	5612	4958	20134
	2017-08-20	2017-08-20	81	70	0	2822	4582	5182	4188	16774
	2017-08-21	2017-08-21	84.9	73	0	3088	6400	7141	5666	22295
	2017-08-22	2017-08-22	88	75	0.3	2983	6151	7146	5795	22075
	2017-08-23	2017-08-23	80.1	71.1	T	2994	6586	7297	6122	22999
	2017-08-24	2017-08-24	79	66	0	3688	7061	7849	6289	24887
	2017-08-25	2017-08-25	78.1	64	0	3144	6296	7318	5786	22544
	2017-08-26	2017-08-26	77	62.1	0	2710	4592	5537	4670	17509
	2017-08-27	2017-08-27	77	63	0	2676	4785	5145	4159	16765
	2017-08-28	2017-08-28	75	63	0	3332	6908	7343	5917	23500
	2017-08-29	2017-08-29	68	62.1	0.1	1472	3206	3776	3563	12017
	2017-08-30	2017-08-30	75.9	61	0.01	3468	7159	7656	5858	24141
	2017-08-31	2017-08-31	81	64	0	3279	6705	7536	5934	23454
	T = trace of precipitation			S = snow
			2016	2017			Average Total Counts for August	2016	2017	Percent Change
		Average High Temp (°F)	85.7968	80.0806			All Non-Holiday Weekday	21970.9	21226	-0.0339046
		Average Low Temp (°F)	73.1968	67.9871			Full Month	20590.7	20367.2	-0.0108568
		Total Precipitation (in)	1.96	3.15			Weekend	16622.8	17898.1	0.0767247
		Days with Precip	13	12			Selected Days Average	23282.5	24092.6	0.034795
		Weekdays with Precip	9	10						Selected Days Average for the month includes all non-holiday weekdays with no precipitation (highlighted).
