# Supplementary material
Source: ML conference proceedings conference paper supplement (https://openreview.net/forum?id=j2EaW49Rk7)
Supplement: supplementary_material [file 09 September 2017 Cyclist Numbers for Web.xlsx]

## Sheet: Sept 2017 24 Hr Cyclist Counts
	Cyclist Counts on East River Bridge Locations
	September 2017 24-Hour Counts
	Bicycle and Greenway Program
	Date	Day	High Temp (°F)	Low Temp (°F)	Precipitation	Brooklyn Bridge	Manhattan Bridge	Williamsburg Bridge	Queensboro Bridge	Total
	2017-09-01	2017-09-01	70	55	0	2945	5611	6576	5398	20530
	2017-09-02	2017-09-02	66.9	54	0.53	1876	3121	3625	3325	11947
	2017-09-03	2017-09-03	69.1	60.1	0.74	1004	1867	2479	1711	7061
	2017-09-04	2017-09-04	79	62.1	0	2866	4766	4882	4346	16860
	2017-09-05	2017-09-05	84	70	T	3244	7244	7537	5906	23931
	2017-09-06	2017-09-06	70	62.1	0.42	1232	2672	3310	2951	10165
	2017-09-07	2017-09-07	71.1	59	0.01	3249	7059	7717	5923	23948
	2017-09-08	2017-09-08	70	59	0	3234	6850	7739	5836	23659
	2017-09-09	2017-09-09	69.1	55	0	2609	5035	5849	4471	17964
	2017-09-10	2017-09-10	72	57	0	4960	5673	5773	4381	20787
	2017-09-11	2017-09-11	75.9	55	0	3657	7783	8254	5986	25680
	2017-09-12	2017-09-12	78.1	61	0	3497	7983	8756	6386	26622
	2017-09-13	2017-09-13	82	64.9	0.06	2994	7461	8095	6213	24763
	2017-09-14	2017-09-14	81	70	0.02	3013	6703	7629	5697	23042
	2017-09-15	2017-09-15	81	66.9	0	3344	6998	7749	5853	23944
	2017-09-16	2017-09-16	82	70	0	2560	4860	5568	4532	17520
	2017-09-17	2017-09-17	80.1	70	0	2676	4935	5599	4032	17242
	2017-09-18	2017-09-18	73	69.1	0	2673	6338	6708	4864	20583
	2017-09-19	2017-09-19	78.1	69.1	0.22	2012	4726	5729	4171	16638
	2017-09-20	2017-09-20	78.1	71.1	0	3296	6826	7518	5570	23210
	2017-09-21	2017-09-21	80.1	71.1	0	3317	6663	8151	5792	23923
	2017-09-22	2017-09-22	82	66	0	3297	6272	7570	5547	22686
	2017-09-23	2017-09-23	86	68	0	2810	4940	6167	4635	18552
	2017-09-24	2017-09-24	90	69.1	0	2543	4500	5083	3977	16103
	2017-09-25	2017-09-25	87.1	72	0	3276	7227	7708	5941	24152
	2017-09-26	2017-09-26	82	69.1	0	3157	7676	8150	6179	25162
	2017-09-27	2017-09-27	84.9	71.1	0	3216	7313	7983	6309	24821
	2017-09-28	2017-09-28	78.1	66	0	3421	7301	8118	6277	25117
	2017-09-29	2017-09-29	66.9	55	0	2988	6221	7659	5677	22545
	2017-09-30	2017-09-30	64	55.9	0	1903	3507	4749	3729	13888
	T = trace of precipitation			S = snow
			2016	2017			Average Total Counts for September	2016	2017	Percent Change
		Average High Temp (°F)	78.17	77.0533			All Non-Holiday Weekday	20786	22756	0.0947777
		Average Low Temp (°F)	65.8933	64.1233			Full Month	20012.5	20434.8	0.0211018
		Total Precipitation (in)	2.79	2			Weekend	18333.8	15673.8	-0.145086
		Days with Precip	8	8			Selected Days Average	23176.1	23759.6	0.0251766
		Weekdays with Precip	7	6						Selected Days Average for the month includes all non-holiday weekdays with no precipitation (highlighted).
