# Supplementary material
Source: ML conference proceedings conference paper supplement (https://openreview.net/forum?id=j2EaW49Rk7)
Supplement: supplementary_material [file 10 October 2017 Cyclist Numbers.xlsx]

## Sheet: Oct 2017 24 Hr Cyclist Counts
	Cyclist Counts on East River Bridge Locations
	OCTOBER 2017 24-Hour Counts
	Bicycle and Greenway Program
	Date	Day	High Temp (°F)	Low Temp (°F)	Precipitation	Brooklyn Bridge	Manhattan Bridge	Williamsburg Bridge	Queensboro Bridge	Total
	2017-10-01	2017-10-01	66.9	50	0	2297	4540	5046	4092	15975
	2017-10-02	2017-10-02	72	52	0	3387	7059	7616	5722	23784
	2017-10-03	2017-10-03	70	57	0	3386	7370	8161	6363	25280
	2017-10-04	2017-10-04	75	55.9	0	3412	7691	8136	6238	25477
	2017-10-05	2017-10-05	82	64.9	0	3312	7034	7598	5998	23942
	2017-10-06	2017-10-06	81	69.1	0	2982	6204	7336	5675	22197
	2017-10-07	2017-10-07	80.1	66	0	2750	5019	5873	4576	18218
	2017-10-08	2017-10-08	77	72	0.22	1235	2450	3162	2327	9174
	2017-10-09	2017-10-09	75.9	72	0.26	898	2321	3079	2642	8940
	2017-10-10	2017-10-10	80.1	66	0	3922	7499	8208	6421	26050
	2017-10-11	2017-10-11	75	64.9	0.06	2721	5694	6683	5559	20657
	2017-10-12	2017-10-12	63	55.9	0.07	2411	5083	6043	4603	18140
	2017-10-13	2017-10-13	64.9	52	0	2839	5863	6612	5240	20554
	2017-10-14	2017-10-14	71.1	62.1	0.08	2021	4079	4878	3734	14712
	2017-10-15	2017-10-15	72	66	T	2169	4285	4943	3793	15190
	2017-10-16	2017-10-16	60.1	52	0.01	2751	5752	6391	5045	19939
	2017-10-17	2017-10-17	57.9	43	0	2869	6155	6612	5249	20885
	2017-10-18	2017-10-18	71.1	50	0	3264	6608	7398	5753	23023
	2017-10-19	2017-10-19	70	55.9	0	3265	6860	7742	6167	24034
	2017-10-20	2017-10-20	73	57.9	0	3169	6286	7215	5814	22484
	2017-10-21	2017-10-21	78.1	57	0	2538	4834	6167	4940	18479
	2017-10-22	2017-10-22	75.9	57	0	2744	4967	5328	4474	17513
	2017-10-23	2017-10-23	73.9	64	0	3189	6671	7096	5975	22931
	2017-10-24	2017-10-24	73	66.9	0.2	954	2614	3251	2682	9501
	2017-10-25	2017-10-25	64.9	57.9	0	3367	6720	7294	5856	23237
	2017-10-26	2017-10-26	57	53.1	0	2565	5217	5958	5011	18751
	2017-10-27	2017-10-27	62.1	48	0	3150	5610	6450	5181	20391
	2017-10-28	2017-10-28	68	55.9	0	2245	4520	5104	4069	15938
	2017-10-29	2017-10-29	64.9	61	3.03	183	661	1026	965	2835
	2017-10-30	2017-10-30	55	46	0.25	1428	2966	3547	2924	10865
	2017-10-31	2017-10-31	54	44	0	2727	5597	5894	4883	19101
	T = trace of precipitation			S = snow
			2016	2017			Average Total Counts for October	2016	2017	Percent Change
		Average High Temp (°F)	64.6806	69.8355			All Non-Holiday Weekday	19276.8	20462	0.0614804
		Average Low Temp (°F)	53	57.9161			Full Month	16519.3	18651.5	0.129073
		Total Precipitation (in)	4.15	4.18			Weekend	10728.6	14226	0.325988
		Days with Precip	8	10			Selected Days Average	20680.8	22632.6	0.0943782
		Weekdays with Precip	4	6						Selected Days Average for the month includes all non-holiday weekdays with no precipitation (highlighted).
