# Supplementary material
Source: ML conference proceedings conference paper supplement (https://openreview.net/forum?id=j2EaW49Rk7)
Supplement: supplementary_material [file attachment]

## Sheet: May 2016 24 Hr Cyclist Counts
	Cyclist Counts on East River Bridge Locations
	May 2017 24-Hour Counts
	Bicycle and Greenway Program
	Date	Day	High Temp (°F)	Low Temp (°F)	Precipitation	Brooklyn Bridge	Manhattan Bridge	Williamsburg Bridge	Queensboro Bridge	Total
	2017-05-01	2017-05-01	72	50	0	3084	6506	6793	4820	21203
	2017-05-02	2017-05-02	73.9	66.9	0	3423	7035	7789	5449	23696
	2017-05-03	2017-05-03	64.9	57.9	0	3342	6984	7445	4804	22575
	2017-05-04	2017-05-04	63	50	0	3019	6525	6922	5144	21610
	2017-05-05	2017-05-05	59	52	3.02	513	1471	1951	1421	5356
	2017-05-06	2017-05-06	64.9	57	0.18	1892	3815	5502	3965	15174
	2017-05-07	2017-05-07	54	48.9	0.01	3539	3547	4941	3851	15878
	2017-05-08	2017-05-08	57	45	0	2886	5812	6249	4432	19379
	2017-05-09	2017-05-09	61	48	0	2718	6455	6910	5000	21083
	2017-05-10	2017-05-10	70	51.1	0	2810	6396	7075	4980	21261
	2017-05-11	2017-05-11	61	51.8	0	2657	6179	6750	5139	20725
	2017-05-12	2017-05-12	62.1	51.1	0	2640	5367	6325	4692	19024
	2017-05-13	2017-05-13	51.1	45	1.31	151	484	874	865	2374
	2017-05-14	2017-05-14	64.9	46	0.02	1452	2704	3320	2389	9865
	2017-05-15	2017-05-15	66.9	55.9	0	2685	5865	5981	4550	19081
	2017-05-16	2017-05-16	78.1	57.9	0	3666	7847	8420	6209	26142
	2017-05-17	2017-05-17	90	66	0	3535	7888	8540	6121	26084
	2017-05-18	2017-05-18	91.9	75	0	3190	6886	7645	5753	23474
	2017-05-19	2017-05-19	90	75.9	0	2952	6432	6859	5272	21515
	2017-05-20	2017-05-20	64	55.9	0.01	2161	3896	5198	3910	15165
	2017-05-21	2017-05-21	66.9	55	0	2612	4656	5634	3782	16684
	2017-05-22	2017-05-22	61	54	0.59	768	1633	2116	1609	6126
	2017-05-23	2017-05-23	68	57.9	0	3174	6715	7011	4899	21799
	2017-05-24	2017-05-24	66.9	57	0.04	2969	6005	6872	4344	20190
	2017-05-25	2017-05-25	57.9	55.9	0.58	488	1196	1789	1316	4789
	2017-05-26	2017-05-26	73	55.9	0.1	2590	4563	5344	3642	16139
	2017-05-27	2017-05-27	71.1	61	0	2609	4013	6105	3703	16430
	2017-05-28	2017-05-28	71.1	59	0	2640	4048	5456	3549	15693
	2017-05-29	2017-05-29	57.9	55.9	0.13	836	1730	2738	1704	7008
	2017-05-30	2017-05-30	59	55.9	0.06	2301	5366	5938	4431	18036
	2017-05-31	2017-05-31	75	57.9	0.03	2689	5717	6523	4575	19504
	T = trace of precipitation			S = snow
			2016	2017			Average Total Counts for May	2016	2017	Percent Change
		Average High Temp (°F)	69.6645	67.3387			All Non-Holiday Weekday	18847	18513	-0.0180414
		Average Low Temp (°F)	56.7839	55.8935			Full Month	16797.5	17195.5	0.0231493
		Total Precipitation (in)	3.75	6.08			Weekend	12668.7	13407.9	0.0551324
		Days with Precip	16	13			Selected Days Average	22521	21910.1	-0.0271273
		Weekdays with Precip	4	9						Selected Days Average for the month includes all non-holiday weekdays with no precipitation (highlighted).
