# Supplementary material
Source: ML conference proceedings conference paper supplement (https://openreview.net/forum?id=j2EaW49Rk7)
Supplement: supplementary_material [file Book1.xlsx]

## Sheet: Sheet1
dataset	boosting	fc	pp
boston	0.2	8	8
gdp	1	0.5	0.5
insurance	8	8	8
tic	0.1	0.1	0.1
titanic	0.2	4	4
used cars	0.5	16	16
wage	0.2	16	16
Demo	1	16	16
Gender	0.1	0.1	0.1
IBM	0.1	0.1	0.1
mobile	8	16	16
telco	16	16	16
world	0.2	0.7	0.7
breast	0.1	1	1
s
