# Supplementary material
Source: ML conference proceedings conference paper supplement (https://openreview.net/forum?id=j2EaW49Rk7)

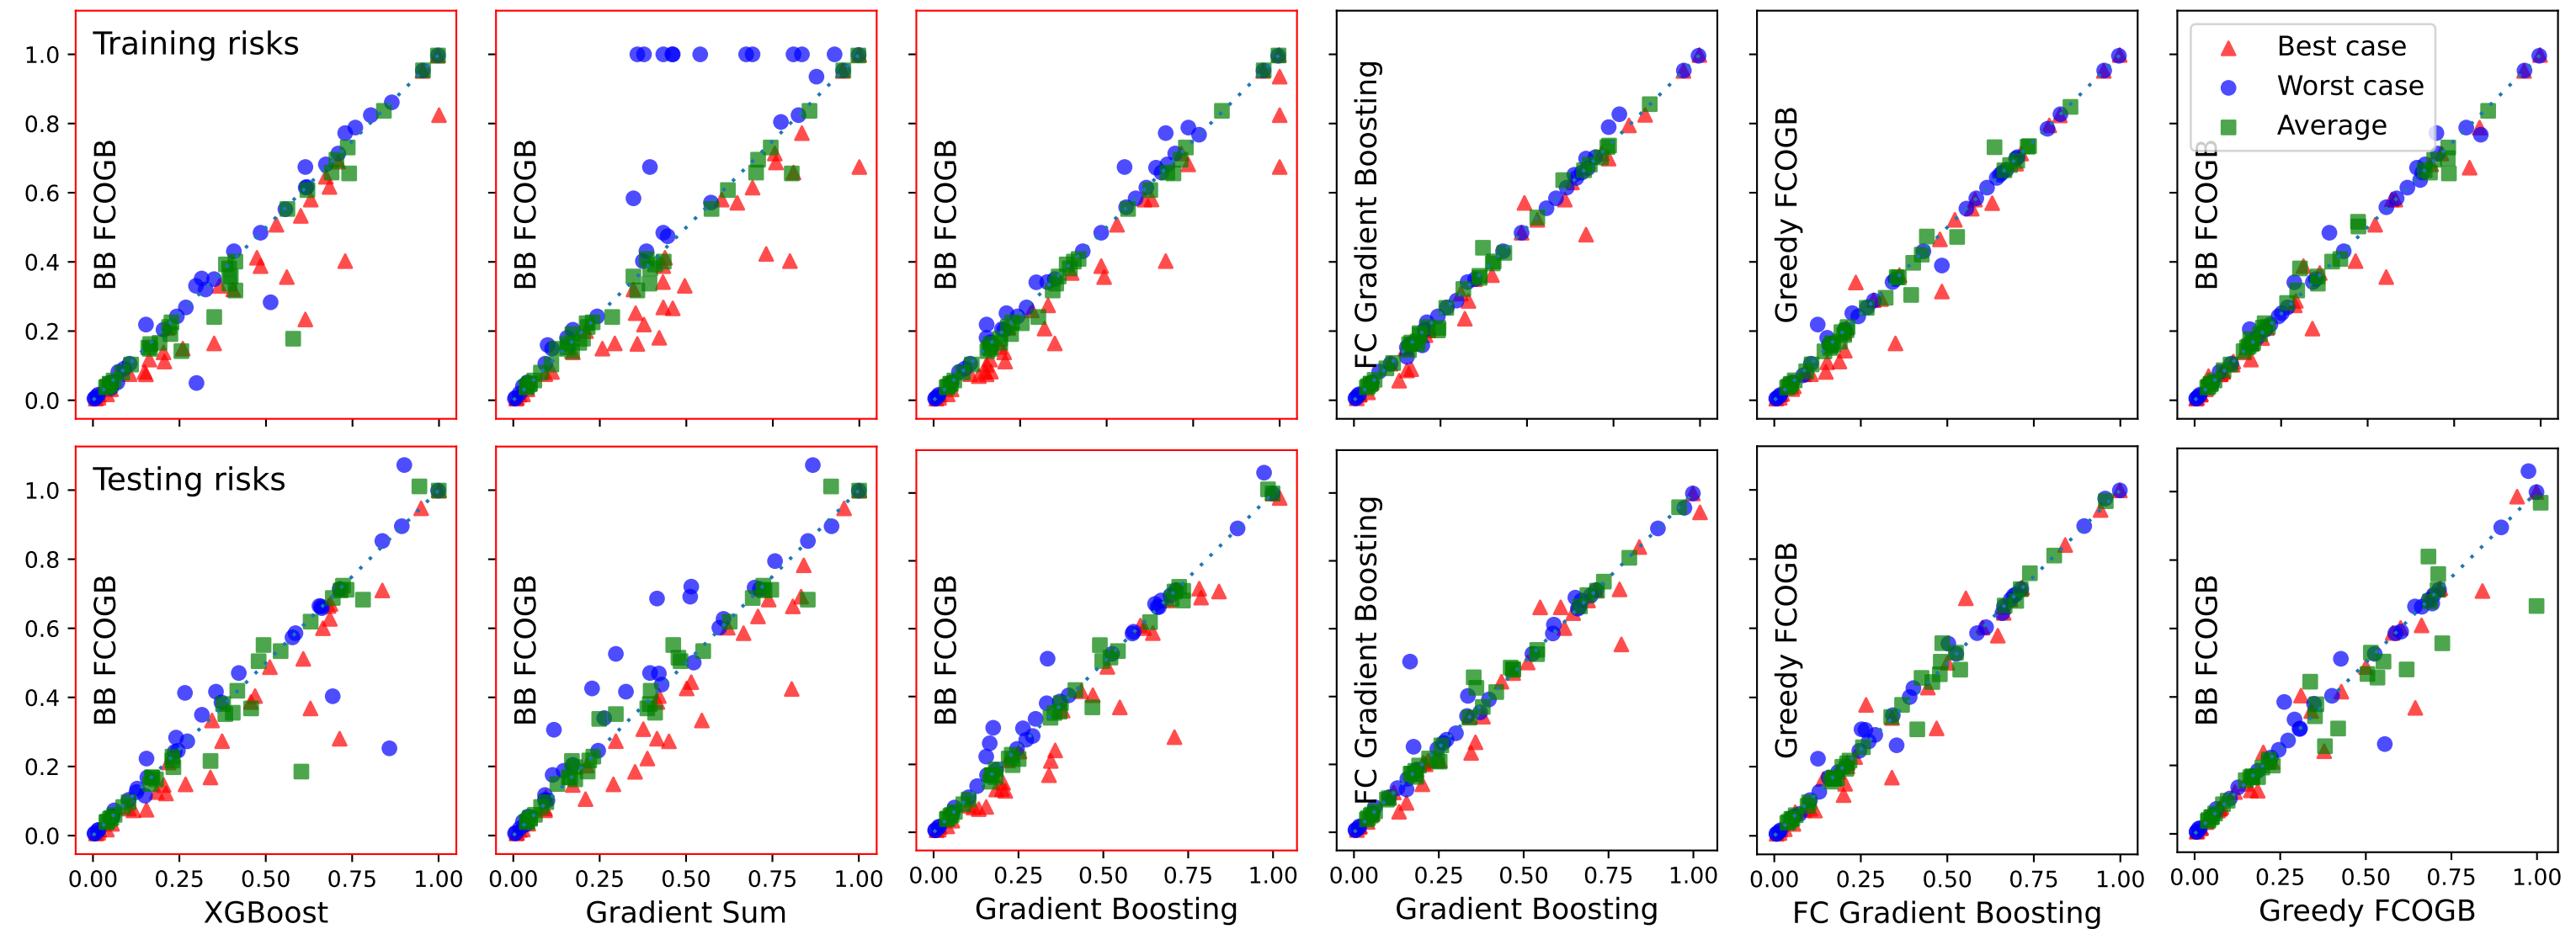

Supplement: supplementary_material [file attachment]

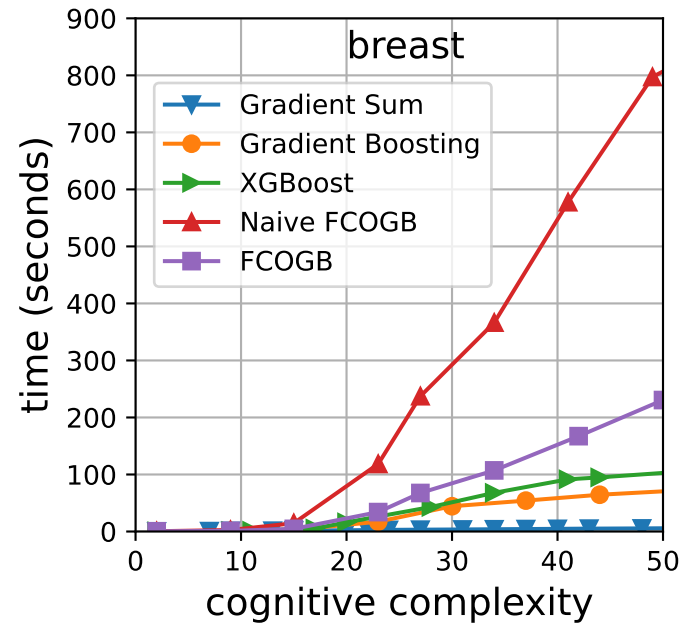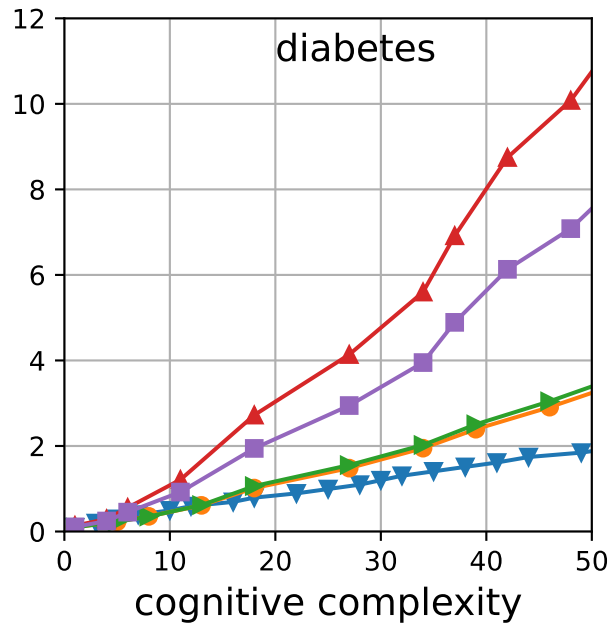

Supplement: supplementary_material [file attachment]

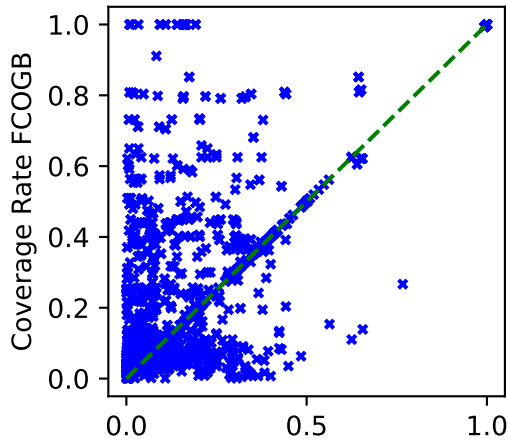

Coverage Rate Gradient Boosting

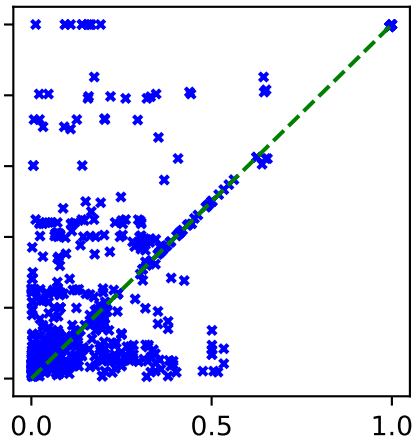

Coverage Rate XGBoosting

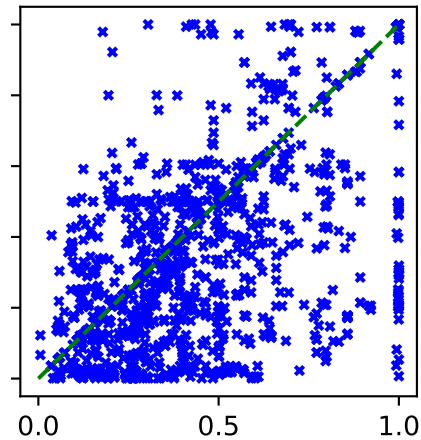

Coverage Rate Gradient Sum

Supplement: supplementary_material [file attachment]

# banknote

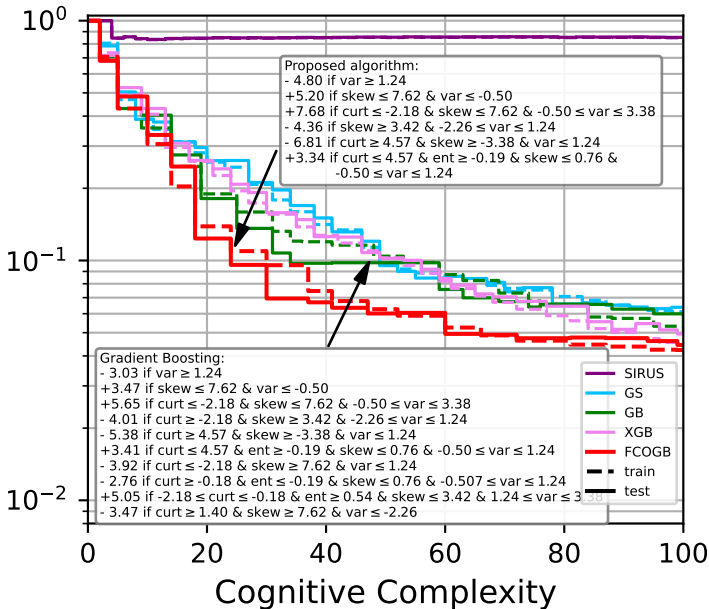

Supplement: supplementary_material [file attachment]

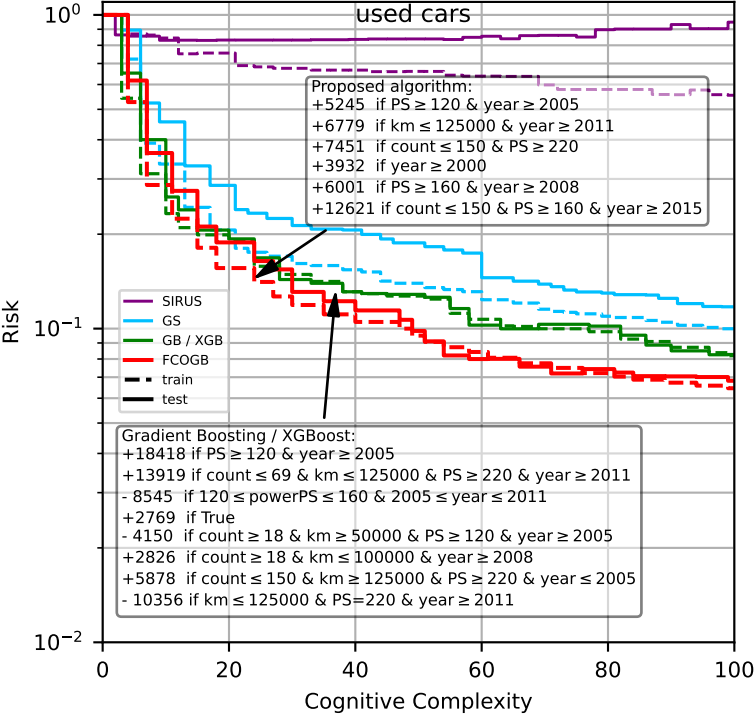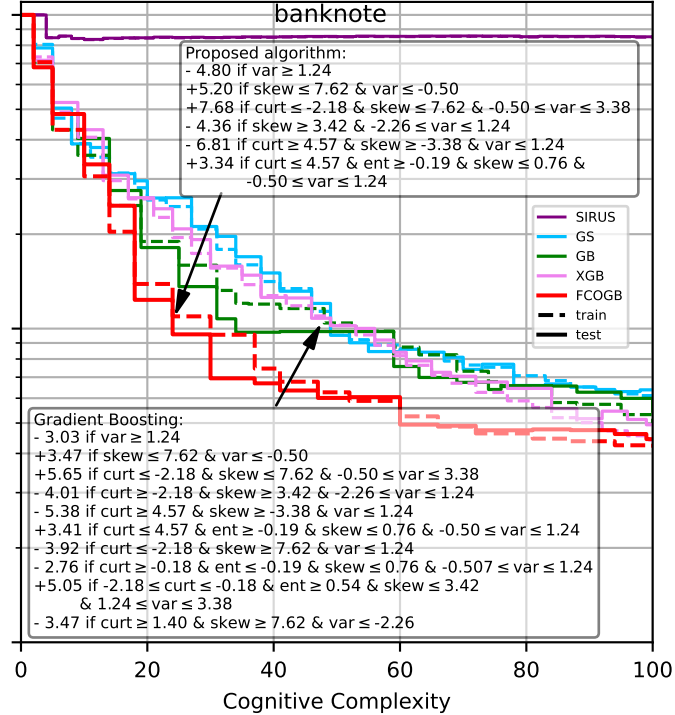

Supplement: supplementary_material [file attachment]

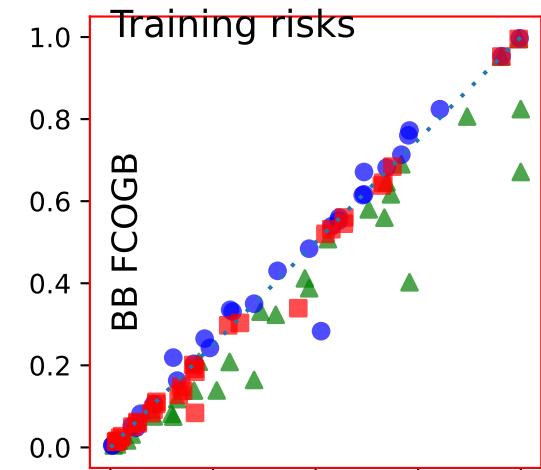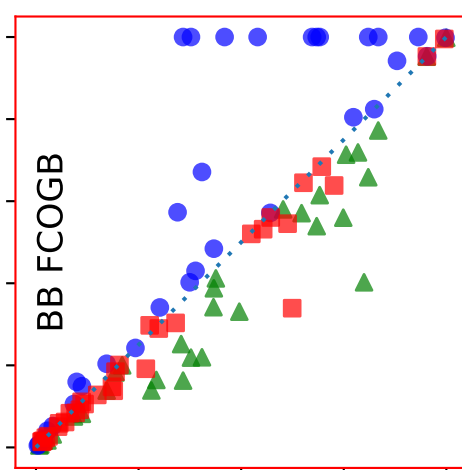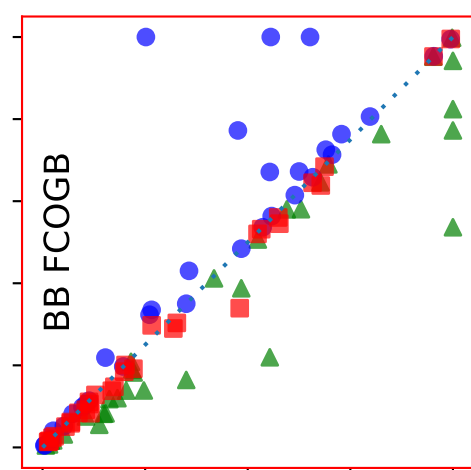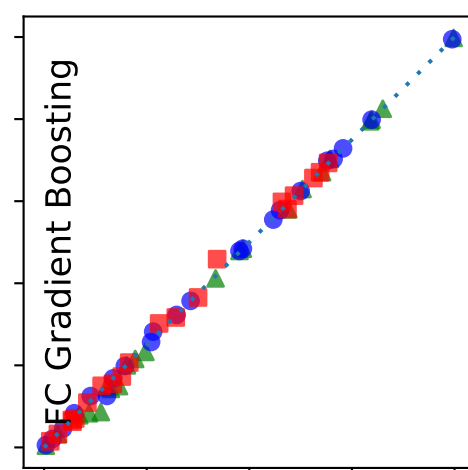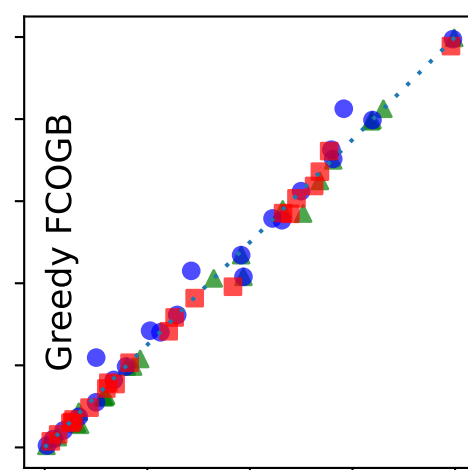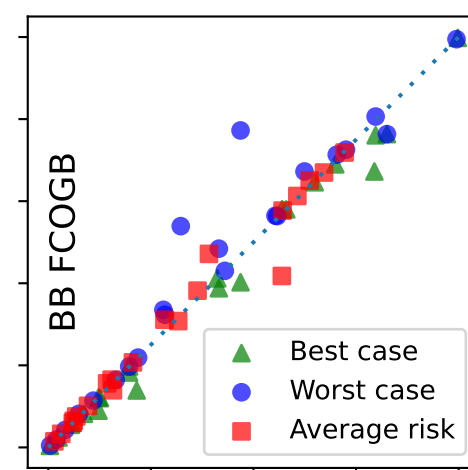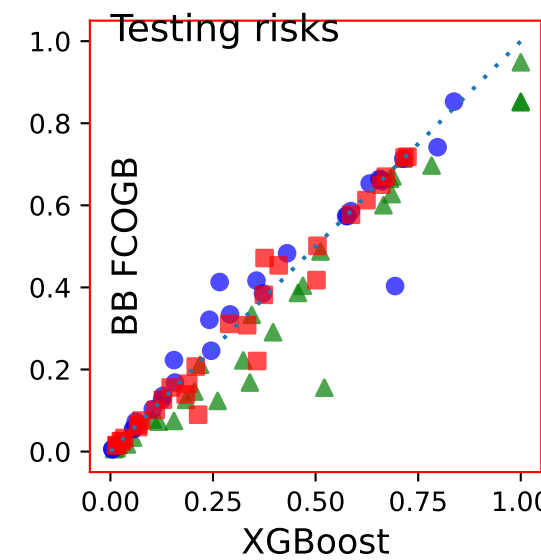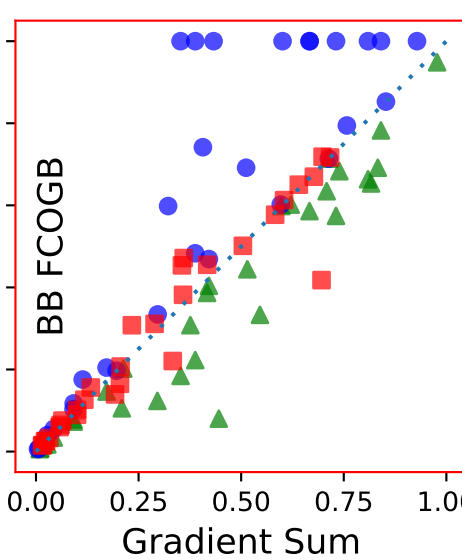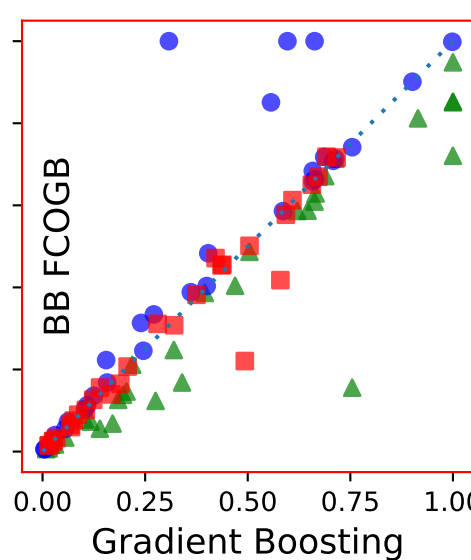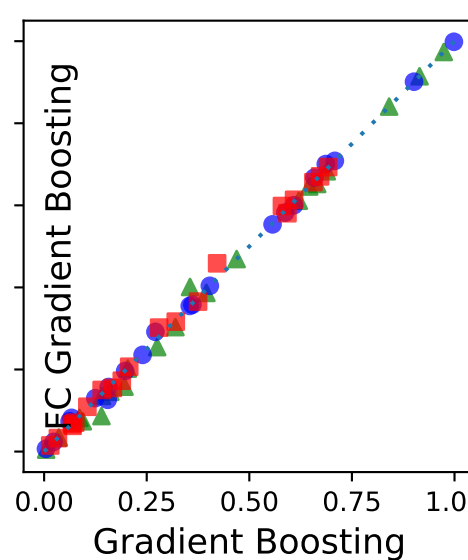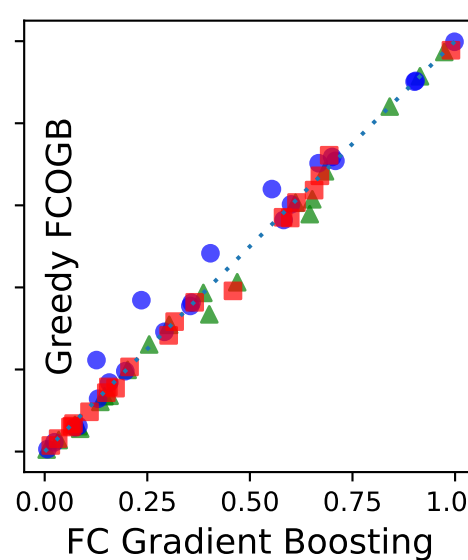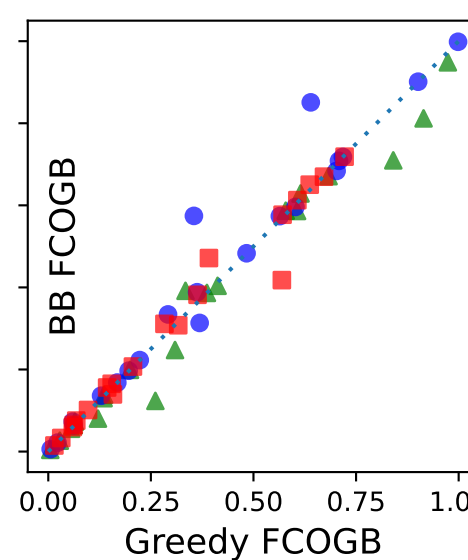

Supplement: supplementary_material [file attachment]

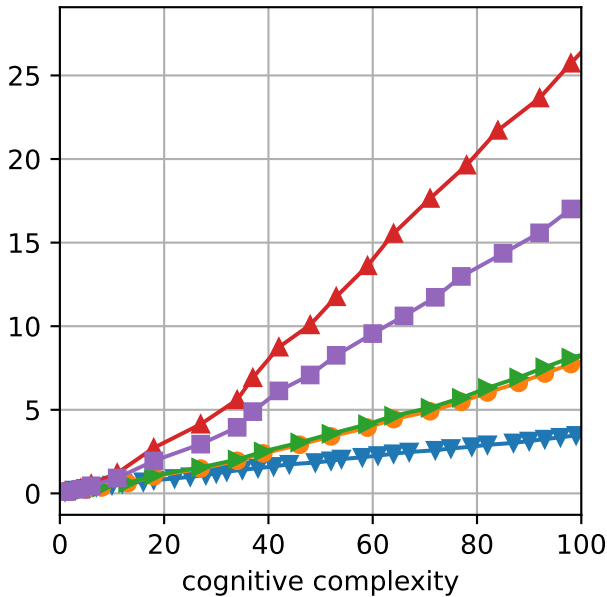

Supplement: supplementary_material [file attachment]

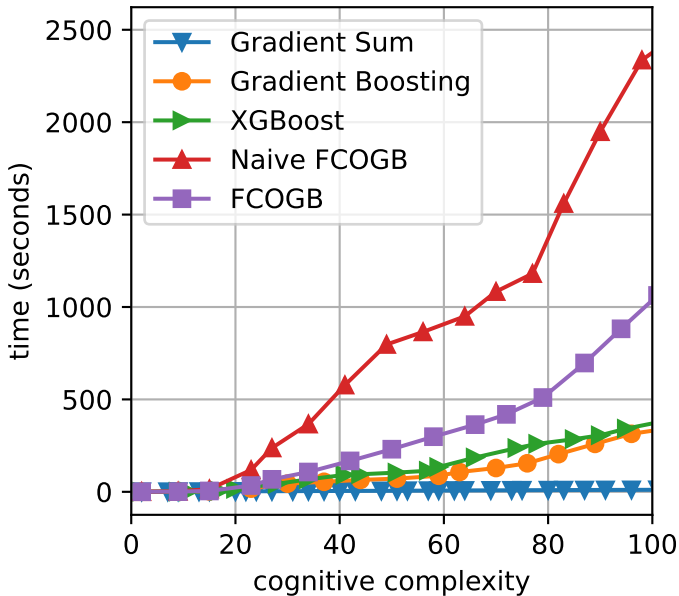

Supplement: supplementary_material [file attachment]
